# Supplementary material
Source: PubMed Central journal article supplement (PMC4434702)
Supplement: pnas.201422934SI.pdf [file pnas.201422934SI.pdf]

# Supporting Information

Mertz et al. 10.1073/pnas.1422934112

```

1  ATGACAAATF CAAAAGAAGA CGCCGACATA GAGGAGAAGC ATATGTACAA TGAGCCGGTC ACAACCCCTCT TTCACGACGT TGAAGCTTCA
91  CAAACACACC ACAGACGTGG GTCAATACCA TTGAAAGATG AGAAAAGTAA AGAATTGTAT CCATTGCGCT CTTTCCCGAC GAGAGTAAAT
181 GGCAGAGATA CGTTCTCTAT GGAGGATGGC ATAGGTGATG AAGATGAAGG AGAAGTACAG AACGTGAAG TGAAGAGAGA GCTTAAGCAA
271 AGACATATTG GTATGATTGC CCTTGGTGGT ACTATTGGTA CAGGTCTTTT CATTGGTTTA TCCACACCTC TGACCAACGC CGGCCAGTG
361 GGCCTCTTA TATCATATTT ATTTATGGGT TCTTTGGCAT ATTCTGTAC GCAGTCTTG GGTGAAATGG CTACATTCAT CCTGTTACA
451 TCCTCTTTCA CAGTTTTTCT ACAAGATTC CTTTCTCCAG CATTGGTGC GGCCAATGGT TACATGTATT GGTTTTCTTG GGCAATCACT
541 TTTGCCCTGG AACTTAGTGT GTTGCCAA GTCATTCAAT TTTGACGTA CAAAGTTCCA CTGGCGGCAT GGATTAGTAT TTTTGGGTA
631 ATTATCACAA TAATGAACCT GTTCCCTGTC AAATATTACG GTGAATTCGA GTTCTGGGTC GCTTCCATCA AAGTTTTAGC CATTATCGGG
721 TTTCTAATAT ACTGTTTTTG TATGGTTTGT GGTGCTGGGG TTACCGGCC AGTTGGATTC CGTTATTGGA GAAACCCAGG TGCCTGGGGT
811 CCAGGTATAA TATCTAAGGA TAAAACGAA GGGAGTCT TAGGTTGGGT TTCCTCTTG ATTAACGCTG CCTTCACATT TCAAGGTACT
901 GAACTAGTTG GTATCACTGC TGGTGAAGCT GCAAACCCCA GAAAATCCGT TCCAAGAGCC ATCAAAAAAG TGTGTTTTCCG TATCTTAACC
991 TTCTACATTG GCTCTCTATT ATTCATTGGA CTTTTAGTTC CATACAATGA CCCTAAACTA ACACAATCTA CTTCTACGT TTCTACTTCT
1081 CCCTTTATTA TTGCTATTGA GAACTCTGGT ACAAAGGTTT TGCCACATAT CTTCAACGCT GTTATCTTAA CAACCATTAT TTCGCGCA
1171 AATTCAAATA TTTACGTGG TTCCCGTATT TTATTTGGTC TATCAAAGAA CAAGTTGGCT CCTAAATTCC TGTCAAGGAC CACCAAAGGT
1261 GGTGTTCCAT ACATTGCAGT TTCGTTACT GCTGCATTG GCGCTTGGC TTACATGGAG ACATCTACTG GTGGTGACAA AGTTTTCGAA
1351 TGGCTATTAA ATATCACTGG TGTTCAGGC TTTTTGCAT GGTATTATTA CTCAATCTCG CACATCAGAT TTATGCAAGC TTTGAAATAC
1441 CGTGGCATCT CTCGTGACGA GTTACCATT AAAGCTAAAT TAATGCCCGG CTGGCTTAT TATGCGCCA CATTATGAC GATCATTATC
1531 ATTATTCAAG GTTTCACGGC TTTTGCACCA AAATTCATG GTGTTAGCTT TGCTGCGCC TATATCTCTA TTTTCTGTT CTTAGCTGTT
1621 TGATCTTAT TTCAATGCAT ATTCAGATGC AGATTTATTT GGAAGATTGG AGATGTCGAC ATCGATTCCG ATAGAAGAGA CATTGAGGCA
1711 ATTGTATGGG AAGATCATGA ACCAAAGACT TTTTGGGACA AATTTGGAA TGTTGTAGCA TAG

```

Fig. S1. Spectrum of spontaneous *can1* mutations in the *msh6 pol3-R696W* strain containing pPOL3. Mutations (bold text) are displayed above the coding sequence of *CAN1* (plain text). Nucleotides are numbered from the start of the *CAN1* ORF. The data are summarized in Table 1 and Fig. 4D.



### C. Wild-type Pol $\delta$ (S-phase dNTP concentrations)

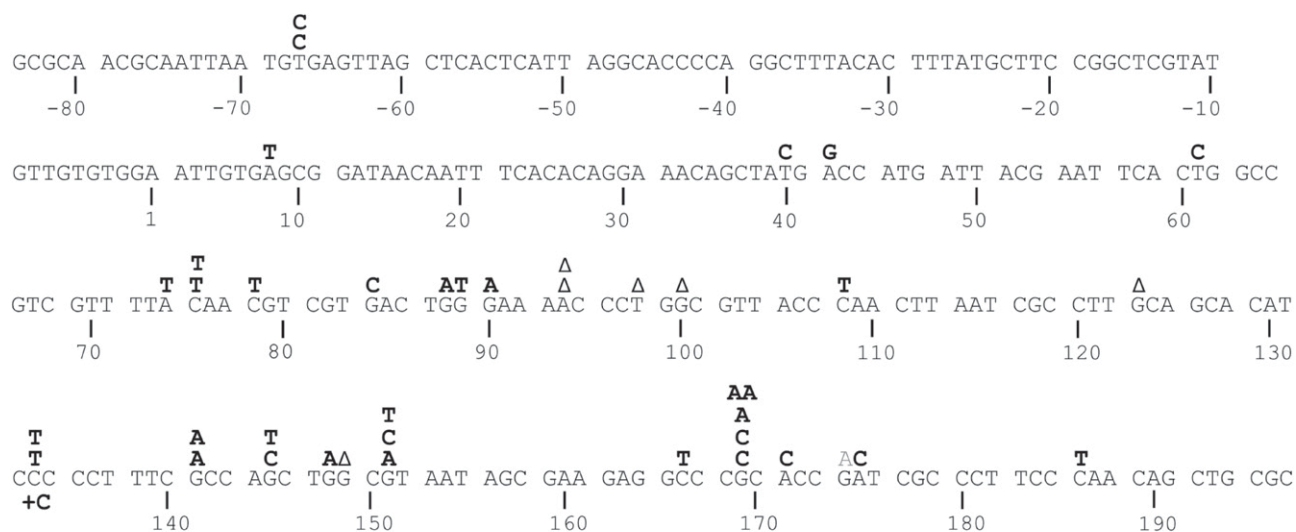

### D. R696W Pol $\delta$ (S-phase dNTP concentrations)

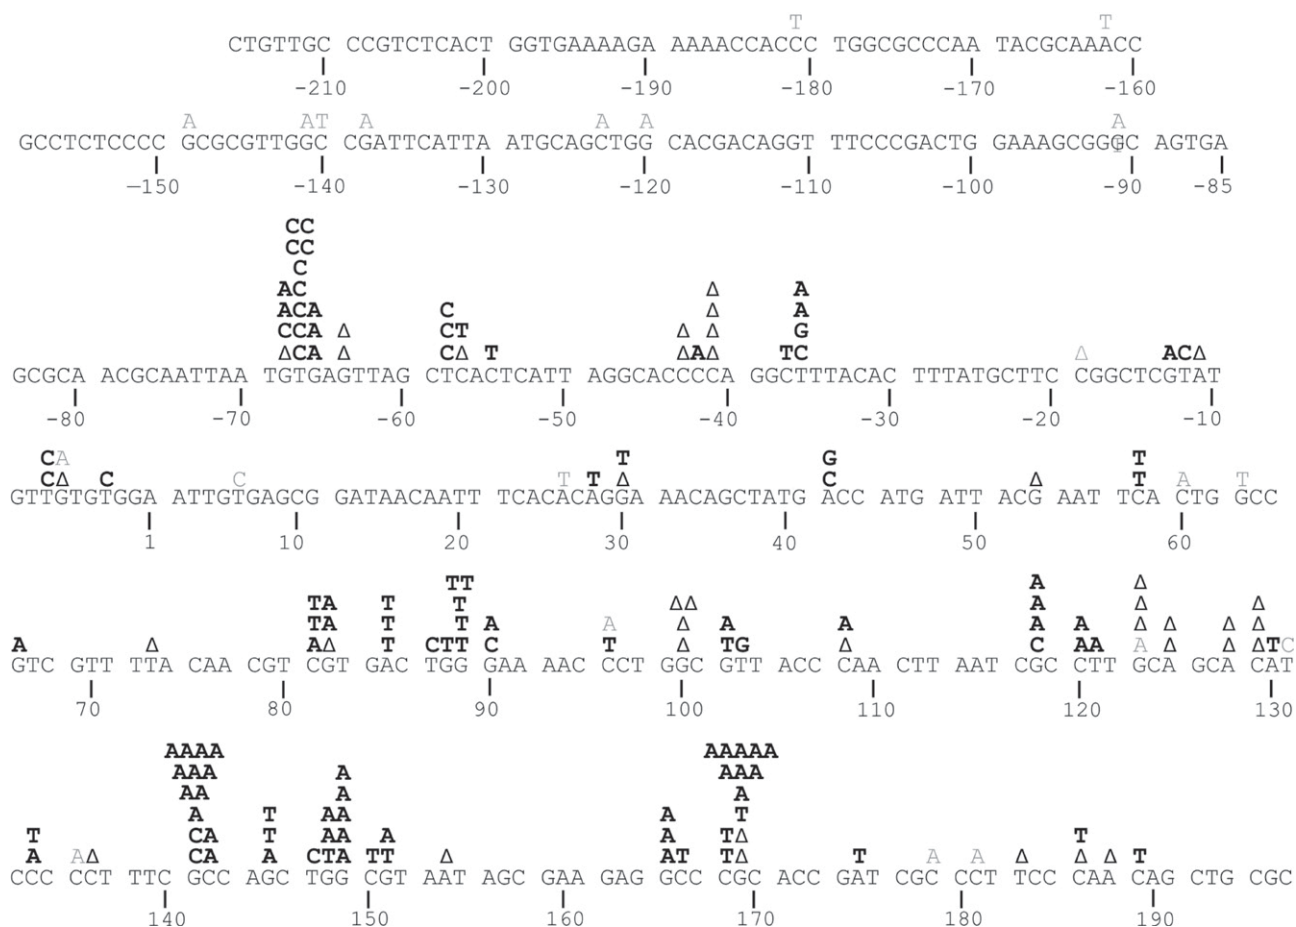

Fig. S2. (continued)

### E. R696W Polδ (dNTP concentrations three-fold higher than estimated for S-phase)

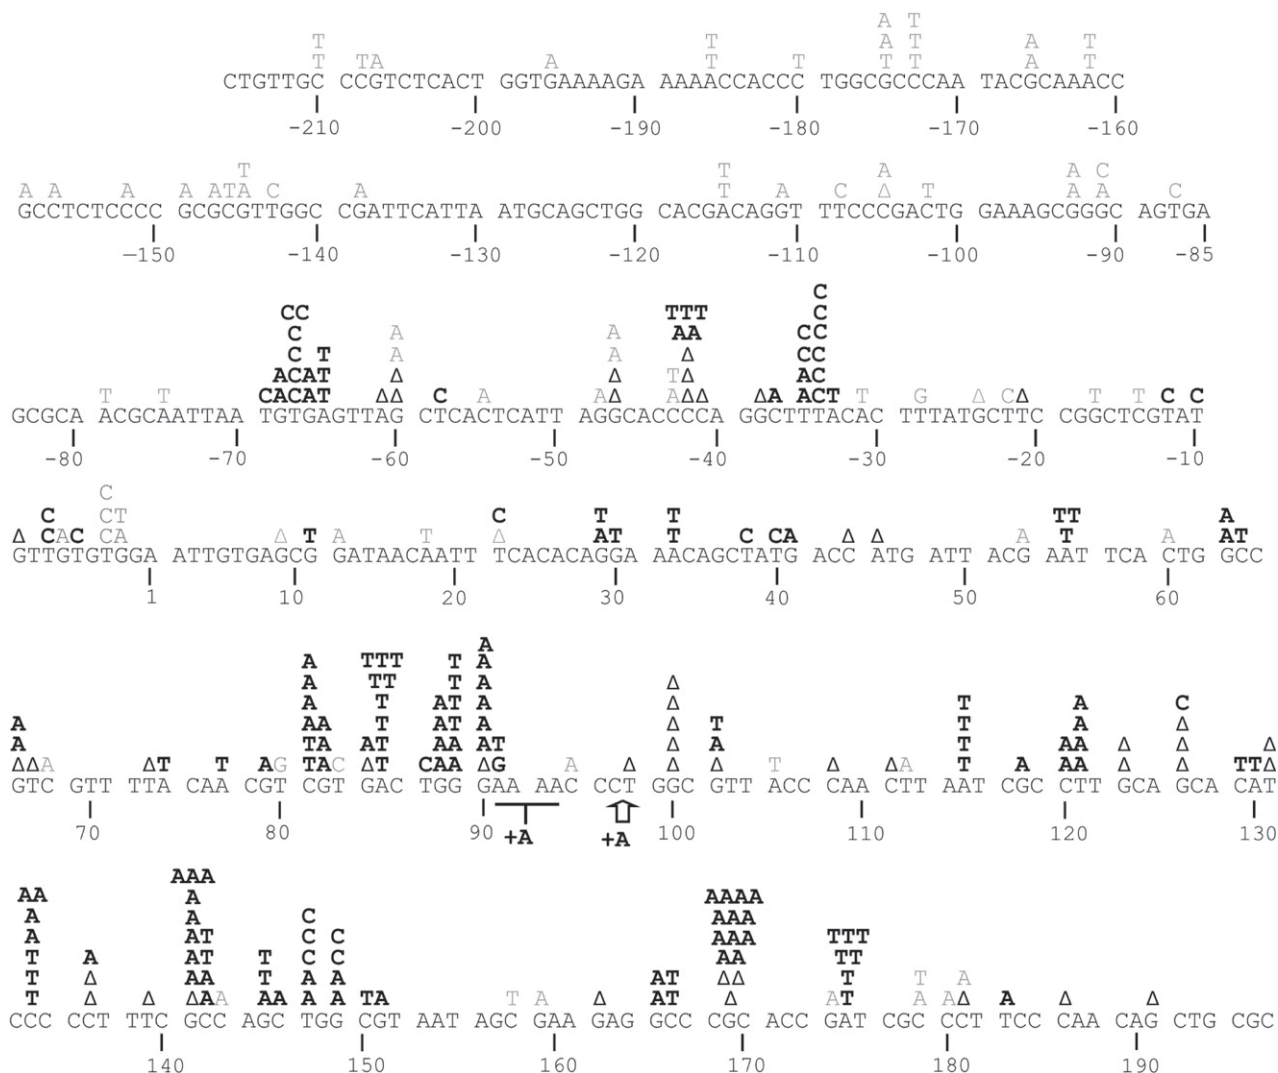

**Fig. S2.** Spectra of mutations generated by wild-type Polδ and Polδ-R696W in vitro at the indicated dNTP concentrations. Base substitutions and deletions (open triangles) are displayed above the *lacZ* sequence. Insertions are shown under the *lacZ* sequence. Detectable mutations are shown in black, bold text. Silent mutations are shown in plain, gray text. The region corresponding to nucleotides -210 to -85 contains no sites at which mutations can be detected. Sequencing of wild-type Polδ synthesis products revealed no mutations in this region. Silent mutations in this region are depicted in the Polδ-R696W spectra. In addition to the point mutations depicted in A–E, the following large deletions were found: wild-type Polδ (100 μM dNTPs) –177 to 127; wild-type Polδ (S-phase dNTPs) –168 to 108; and Polδ-R696W (S-phase dNTPs) –96 to 123, –83 to 117, and 148–228.

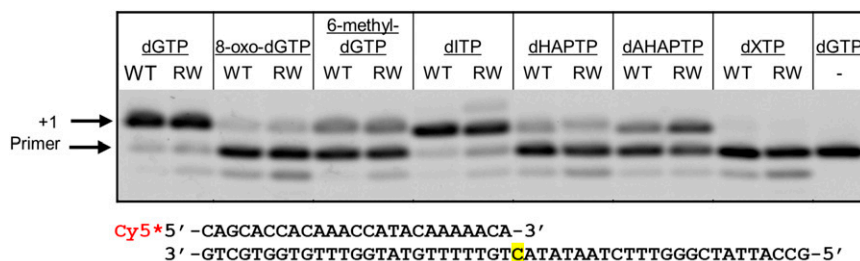

**Fig. S3.** Incorporation of noncanonical dNTPs by wild-type Pol $\delta$  (WT) or Pol $\delta$ -R696W (RW). Reactions were performed with 2.5 nM Pol $\delta$ , 24 nM Cy5-labeled DNA substrate, 40 mM Tris-HCl (pH 7.8), 125 mM NaAc, 8 mM MgAc, 1 mM DTT, 0.2 mg/mL BSA, 4% (wt/vol) polyethyleneglycol 8000, and the indicated dNTP at 100  $\mu$ M for 50 s at 30  $^{\circ}$ C. The DNA substrate is shown below the gel, with the first templating base highlighted in yellow. Reaction products were separated on a 12% (wt/vol) polyacrylamide gel under denaturing conditions. The arrows indicate the position of the unextended primer. dHAPTP, 2'-deoxy-6-hydroxylaminopurine 5'-triphosphate; dXTP, 2'-deoxyxanthosine 5'-triphosphate.

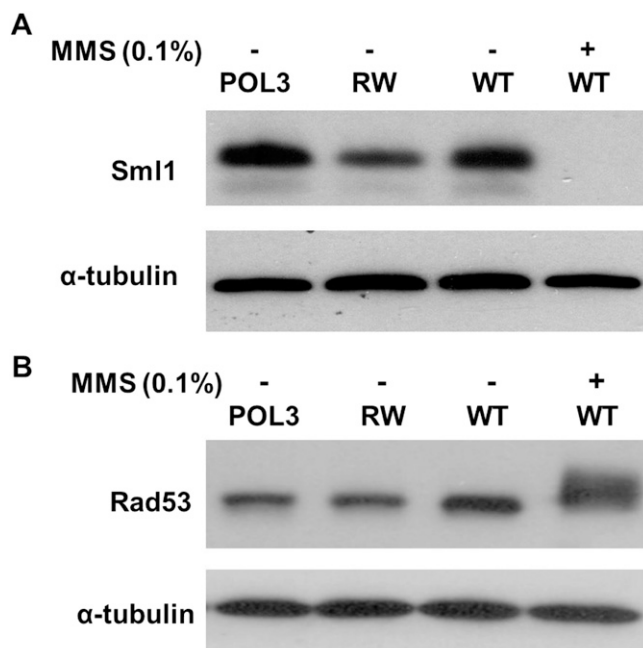

**Fig. S4.** Western blot analysis of proteins that modulate RNR activity. Immunoblots were conducted using whole-cell extracts from a wild-type strain containing pPOL3 (POL3), a *pol3-R696W* strain containing pPOL3 (RW), and a wild-type yeast strain without pPOL3 (WT) using the indicated primary antibodies. Experimental and loading control blots in each panel are from the same gel. A wild-type strain treated with the DNA damaging agent methyl methanesulfonate (MMS), which activates the DNA damage checkpoint, was used as a control. (A) *pol3-R696W* strains have reduced levels of RNR inhibitor Sml1. (B) *pol3-R696W* strains do not show detectable Rad53 phosphorylation.







**Table S4. Yeast strains used in this study**

| Strain                               | Relevant chromosomal mutation*      | Plasmid             | CAN1 allele                      | Genotype                                                                                                                                                                                           |
|--------------------------------------|-------------------------------------|---------------------|----------------------------------|----------------------------------------------------------------------------------------------------------------------------------------------------------------------------------------------------|
| Haploid strains used to produce data |                                     |                     |                                  |                                                                                                                                                                                                    |
| 1B-D770                              | WT                                  | —                   | CAN1                             | MATa <i>ade5-1 lys2-Tn5-13 trp1-289 his7-2 leu2-3,112 ura3-4</i>                                                                                                                                   |
| TM20                                 | WT                                  | pPOL3               | CAN1                             | MATa <i>ade5-1 lys2-Tn5-13 trp1-289 his7-2 leu2-3,112 ura3-4 [GAL1-POL3]</i>                                                                                                                       |
| TM19                                 | <i>pol3-R696W</i>                   | pPOL3               | CAN1                             | MATa <i>ade5-1 lys2-Tn5-13 trp1-289 his7-2 leu2-3,112 ura3-4 pol3-R696W [GAL1-POL3]</i>                                                                                                            |
| TM30                                 | WT                                  | —                   | CAN1:: <i>KI.LEU2</i>            | MATa <i>ade5-1 lys2-Tn5-13 trp1-289 his7-2 leu2-3,112 ura3-4 CAN1::<i>KI.LEU2</i></i>                                                                                                              |
| TM42                                 | WT                                  | pPOL3               | CAN1:: <i>KI.LEU2</i>            | MATa <i>ade5-1 lys2-Tn5-13 trp1-289 his7-2 leu2-3,112 ura3-4 CAN1::<i>KI.LEU2 [GAL1-POL3]</i></i>                                                                                                  |
| TM43                                 | <i>msh6Δ</i>                        | pPOL3               | CAN1:: <i>KI.LEU2</i>            | MATa <i>ade5-1 lys2-Tn5-13 trp1-289 his7-2 leu2-3,112 ura3-4 CAN1::<i>KI.LEU2 msh6Δ::HygB [GAL1-POL3]</i></i>                                                                                      |
| TM34                                 | <i>pol3-R696W</i>                   | pPOL3               | CAN1:: <i>KI.LEU2</i>            | MATa <i>ade5-1 lys2-Tn5-13 trp1-289 his7-2 leu2-3,112 ura3-4 CAN1::<i>KI.LEU2 pol3-R696W [GAL1-POL3]</i></i>                                                                                       |
| TM36                                 | <i>pol3-R696W msh6</i>              | pPOL3               | CAN1:: <i>KI.LEU2</i>            | MATa <i>ade5-1 lys2-Tn5-13 trp1-289 his7-2 leu2-3,112 ura3-4 CAN1::<i>KI.LEU2 pol3-R696W msh6Δ::HygB [GAL1-POL3]</i></i>                                                                           |
| TM52                                 | <i>dun1Δ</i>                        | pPOL3               | CAN1:: <i>KI.LEU2</i>            | MATa <i>ade5-1 lys2-Tn5-13 trp1-289 his7-2 leu2-3,112 ura3-4 CAN1::<i>KI.LEU2 dun1Δ::KanMX [GAL1-POL3]</i></i>                                                                                     |
| TM51                                 | <i>sml1Δ</i>                        | pPOL3               | CAN1:: <i>KI.LEU2</i>            | MATa <i>ade5-1 lys2-Tn5-13 trp1-289 his7-2 leu2-3,112 ura3-4 CAN1::<i>KI.LEU2 sml1Δ::HygB [GAL1-POL3]</i></i>                                                                                      |
| TM69                                 | <i>crt1Δ</i>                        | pPOL3               | CAN1:: <i>KI.LEU2</i>            | MATa <i>ade5-1 lys2-Tn5-13 trp1-289 his7-2 leu2-3,112 ura3-4 CAN1::<i>KI.LEU2 crt1Δ::KanMX [GAL1-POL3]</i></i>                                                                                     |
| TM70                                 | <i>dun1Δ sml1Δ crt1Δ</i>            | pPOL3               | CAN1:: <i>KI.LEU2</i>            | MATa <i>ade5-1 lys2-Tn5-13 trp1-289 his7-2 leu2-3,112 ura3-4 CAN1::<i>KI.LEU2 dun1Δ::KanMX sml1Δ::HygB crt1Δ::NatMX [GAL1-POL3]</i></i>                                                            |
| TM56                                 | <i>pol3-R696W dun1Δ</i>             | pPOL3               | CAN1:: <i>KI.LEU2</i>            | MATa <i>ade5-1 lys2-Tn5-13 trp1-289 his7-2 leu2-3,112 ura3-4 CAN1::<i>KI.LEU2 pol3-R696W dun1Δ::KanMX [GAL1-POL3]</i></i>                                                                          |
| TM58                                 | <i>pol3-R696W sml1Δ</i>             | pPOL3               | CAN1:: <i>KI.LEU2</i>            | MATa <i>ade5-1 lys2-Tn5-13 trp1-289 his7-2 leu2-3,112 ura3-4 CAN1::<i>KI.LEU2 pol3-R696W sml1Δ::HygB [GAL1-POL3]</i></i>                                                                           |
| TM59                                 | <i>pol3-R696W dun1Δ sml1Δ</i>       | pPOL3               | CAN1:: <i>KI.LEU2</i>            | MATa <i>ade5-1 lys2-Tn5-13 trp1-289 his7-2 leu2-3,112 ura3-4 CAN1::<i>KI.LEU2 pol3-R696W dun1Δ::KanMX sml1Δ::HygB [GAL1-POL3]</i></i>                                                              |
| TM68                                 | <i>pol3-R696W dun1Δ sml1Δ crt1Δ</i> | pPOL3               | CAN1:: <i>KI.LEU2</i>            | MATa <i>ade5-1 lys2-Tn5-13 trp1-289 his7-2 leu2-3,112 ura3-4 CAN1::<i>KI.LEU2 pol3-R696W dun1Δ::KanMX sml1Δ::HygB crt1Δ::NatMX [GAL1-POL3]</i></i>                                                 |
| TM71                                 | <i>pol3-R696W dun1Δ</i>             | pPOL3 + pDUN1       | CAN1:: <i>KI.LEU2</i>            | MATa <i>ade5-1 lys2-Tn5-13 trp1-289 his7-2 leu2-3,112 ura3-4 CAN1::<i>KI.LEU2 pol3-R696W dun1Δ::KanMX [DUN1] [GAL1-POL3]</i></i>                                                                   |
| TM72                                 | WT                                  | pPOL3.GST           | CAN1                             | MATa <i>ade5-1 lys2-Tn5-13 trp1-289 his7-2 leu2-3,112 ura3-4 [GAL1-GST-POL3]</i>                                                                                                                   |
| TM73                                 | WT                                  | pPOL3.GST-5DV       | CAN1                             | MATa <i>ade5-1 lys2-Tn5-13 trp1-289 his7-2 leu2-3,112 ura3-4 [GAL1-GST-POL3-5DV]</i>                                                                                                               |
| TM74                                 | WT                                  | pPOL3.GST-R696W     | CAN1                             | MATa <i>ade5-1 lys2-Tn5-13 trp1-289 his7-2 leu2-3,112 ura3-4 [GAL1-GST-POL3-R696W]</i>                                                                                                             |
| TM75                                 | WT                                  | pPOL3.GST-5DV,R696W | CAN1                             | MATa <i>ade5-1 lys2-Tn5-13 trp1-289 his7-2 leu2-3,112 ura3-4 [GAL1-GST-POL3-5DV,R696W]</i>                                                                                                         |
| TM76                                 | WT                                  | pPOL3.GST           | CAN1:: <i>KI.LEU2</i>            | MATa <i>ade5-1 lys2-Tn5-13 trp1-289 his7-2 leu2-3,112 ura3-4 CAN1::<i>KI.LEU2 dun1Δ::KanMX [GAL1-GST-POL3]</i></i>                                                                                 |
| TM77                                 | WT                                  | pPOL3.GST-R696W     | CAN1:: <i>KI.LEU2</i>            | MATa <i>ade5-1 lys2-Tn5-13 trp1-289 his7-2 leu2-3,112 ura3-4 CAN1::<i>KI.LEU2 dun1Δ::KanMX [GAL1-GST-POL3-R696W]</i></i>                                                                           |
| Diploid strains used to produce data |                                     |                     |                                  |                                                                                                                                                                                                    |
| TM63                                 | WT                                  | —                   | CAN1:: <i>KI.LEU2/can1::loxP</i> | MATa/MATα <i>ade5-1/ade5-1 lys2-Tn5-13/lys2-InsE<sub>A14</sub> trp1-289/trp1-289 his7-2/his7-2 leu2-3,112/leu2-3,112 ura3-4/lura3-52 can1Δ::loxP/CAN1::<i>KI.LEU2</i></i>                          |
| TM44 × TM34                          | <i>POL3/pol3-R696W</i>              | —                   | CAN1:: <i>KI.LEU2/can1::loxP</i> | MATa/MATα <i>ade5-1/ade5-1 lys2-Tn5-13/lys2-InsE<sub>A14</sub> trp1-289/trp1-289 his7-2/his7-2 leu2-3,112/leu2-3,112 ura3-4/lura3-52 can1Δ::loxP/CAN1::<i>KI.LEU2 POL3/pol3-R696W</i></i>          |
| TM45 × TM43                          | <i>msh6Δ/msh6Δ</i>                  | —                   | CAN1:: <i>KI.LEU2/can1::loxP</i> | MATa/MATα <i>ade5-1/ade5-1 lys2-Tn5-13/lys2-InsE<sub>A14</sub> trp1-289/trp1-289 his7-2/his7-2 leu2-3,112/leu2-3,112 ura3-4/lura3-52 can1Δ::loxP/CAN1::<i>KI.LEU2 msh6Δ::HygB/msh6Δ::KanMX</i></i> |



Table S4. Cont.

| Strain                                          | Relevant chromosomal mutation*               | Plasmid | CAN1 allele                     | Genotype                                                                                                                                                                                                   |
|-------------------------------------------------|----------------------------------------------|---------|---------------------------------|------------------------------------------------------------------------------------------------------------------------------------------------------------------------------------------------------------|
| TM45 × TM36                                     | <i>POL3/pol3-R696W</i><br><i>msh6Δ/msh6Δ</i> | —       | <i>CAN1::KI.LEU2/can1::loxP</i> | <i>MATa/MATα ade5-1/ade5-1 lys2-Tn5-13/lys2-InsE<sub>A14</sub> trp1-289/trp1-289 his7-2/his7-2 leu2-3,112/leu2-3,112 ura3-4/ura3-52 can1Δ::loxP/CAN1::KI.LEU2 POL3/pol3-R696W msh6Δ::HygB/msh6Δ::KanMX</i> |
| TM64                                            | WT                                           | pPOL3   | <i>CAN1::KI.LEU2/can1::loxP</i> | <i>MATa/MATα ade5-1/ade5-1 lys2-Tn5-13/lys2-InsE<sub>A14</sub> trp1-289/trp1-289 his7-2/his7-2 leu2-3,112/leu2-3,112 ura3-4/ura3-52 can1Δ::loxP/CAN1::KI.LEU2 [GAL1-POL3]</i>                              |
| TM44 × TM34                                     | <i>POL3/pol3-R696W</i>                       | pPOL3   | <i>CAN1::KI.LEU2/can1::loxP</i> | <i>MATa/MATα ade5-1/ade5-1 lys2-Tn5-13/lys2-InsE<sub>A14</sub> trp1-289/trp1-289 his7-2/his7-2 leu2-3,112/leu2-3,112 ura3-4/ura3-52 can1Δ::loxP/CAN1::KI.LEU2 POL3/pol3-R696W [GAL1-POL3]</i>              |
| TM46 × TM34                                     | <i>pol3-R696W/pol3-R696W</i>                 | pPOL3   | <i>CAN1::KI.LEU2/can1::loxP</i> | <i>MATa/MATα ade5-1/ade5-1 lys2-Tn5-13/lys2-InsE<sub>A14</sub> trp1-289/trp1-289 his7-2/his7-2 leu2-3,112/leu2-3,112 ura3-4/ura3-52 can1Δ::loxP/CAN1::KI.LEU2 POL3/pol3-R696W [GAL1-POL3]</i>              |
| Strains used in construction of diploid strains |                                              |         |                                 |                                                                                                                                                                                                            |
| E134                                            | WT                                           | —       | <i>CAN1</i>                     | <i>MATα ade5-1 lys2::InsE<sub>A14</sub> trp-289 his7-2 leu2-3,112 ura3-52</i>                                                                                                                              |
| TM39                                            | WT                                           | —       | <i>can1Δ::loxP</i>              | <i>MATα ade5-1 lys2::InsE<sub>A14</sub> trp-289 his7-2 leu2-3,112 ura3-52 can1Δ::loxP</i>                                                                                                                  |
| TM46                                            | <i>pol3-R696W</i>                            | pPOL3   | <i>can1Δ::loxP</i>              | <i>MATα ade5-1 lys2-InsE<sub>A14</sub> trp-289 his7-2 leu2-3,112 ura3-52 can1Δ::loxP pol3-R696W [GAL1-POL3]</i>                                                                                            |
| TM44                                            | WT                                           | pPOL3   | <i>can1Δ::loxP</i>              | <i>MATα ade5-1 lys2-InsE<sub>A14</sub> trp1-289 his7-2 leu2-3,112 ura3-52 can1Δ::loxP [GAL1-POL3]</i>                                                                                                      |
| TM45                                            | <i>msh6Δ</i>                                 | —       | <i>can1Δ::loxP</i>              | <i>MATα ade5-1 lys2-InsE<sub>A14</sub> trp1-289 his7-2 leu2-3,112 ura3-52 can1Δ::loxP msh6Δ::KanMX</i>                                                                                                     |

Details of strain construction are provided in *Materials and Methods*.

\*WT, wild type.
